# SpyChIP identifies cell type-specific transcription factor occupancy from complex tissues

Siqian Feng<sup>1,2,\*</sup> and Richard S. Mann<sup>1,2,3,\*</sup>

<sup>1</sup>Department of Biochemistry and Molecular Biophysics

<sup>2</sup>Mortimer B. Zuckerman Mind Brain Behavior Institute

<sup>3</sup>Department of Systems Biology

Columbia University, New York, New York, USA

\*For correspondence: [sf2607@columbia.edu](mailto:sf2607@columbia.edu) (S. F.) and [rsm10@columbia.edu](mailto:rsm10@columbia.edu) (R. S. M.)

## 24 Abstract

25 Chromatin immunoprecipitation (ChIP) is an important technique for characterizing protein-DNA  
26 binding *in vivo*. One drawback of ChIP based techniques is the lack of cell type-specificity when  
27 profiling complex tissues. To overcome this limitation, we developed SpyChIP to identify cell type-  
28 specific transcription factor (TF) binding sites in native physiological contexts without tissue  
29 dissociation or nuclei sorting. SpyChIP takes advantage of a specific covalent isopeptide bond that  
30 rapidly forms between the 15 amino acid SpyTag and the 17 kD protein SpyCatcher. In SpyChIP, the  
31 target TF is fused with SpyTag by genome engineering, and an epitope tagged SpyCatcher is  
32 expressed in cell populations of interest, where it covalently binds to SpyTag-TF. Cell type-specific  
33 ChIP is obtained by immunoprecipitating chromatin prepared from whole tissues using antibodies  
34 directed against the epitope-tagged SpyCatcher. Using SpyChIP, we identified the genome-wide  
35 binding profiles of the Hox protein Ubx in two distinct cell types of the *Drosophila* haltere disc. Our  
36 results revealed extensive region-specific Ubx-DNA binding events, highlighting the significance of  
37 cell type-specific ChIP and the limitations of whole tissue ChIP approaches. Analysis of  
38 Ubx::SpyChIP results provided novel insights into the relationship between chromatin accessibility  
39 and Ubx-DNA binding, as well as different mechanisms Ubx employs to regulate its downstream *cis*-  
40 regulatory modules (CRMs). In addition to SpyChIP, we suggest that SpyTag-SpyCatcher technology,  
41 as well as other covalent interaction peptide pairs, has many potential *in vivo* applications that were  
42 previously unachievable.

43

44

45

46

47

## 48 Introduction

49 Chromatin immunoprecipitation followed by high throughput sequencing (ChIP-seq) has been an  
50 important technique to query *in vivo* genome-wide binding profiles of transcription factors (TFs) and  
51 chromatin modifications (1). However, when assayed in whole tissues, ChIP-seq reports a mixture of  
52 TF-DNA binding signatures present in multiple cell types, making it difficult to discern a TF's cell type-  
53 specific functions. Several strategies have been developed to obtain cell type-specific TF-DNA  
54 occupancy information. Cell type-specific overexpression of tagged TFs is not an ideal solution,  
55 because non-physiological levels or non-native spatial and/or temporal expression patterns can result  
56 in false positive or false negative binding. An alternative is to sort crosslinked nuclei from dissociated  
57 tissues (2), but dissociation remains a significant technical challenge for many tissues, and the low  
58 yield of sorting makes this strategy only feasible for tissues that can be obtained in large quantity.  
59 Targeted DamID (TaDa), which depends on cell type-specific expression of very low levels DNA  
60 adenine methyltransferase (Dam)-TF fusions, represents another powerful approach (3). However, it  
61 can be challenging to accurately control the levels of the TF-Dam fusions, and DamID-based  
62 methods have the potential to mark a mixture of past and present TF binding events, compromising  
63 the temporal resolution of the results that may be important when characterizing actively developing  
64 tissues.

65 To overcome the limitations of the current techniques, we developed a method based on SpyTag-  
66 SpyCatcher technology (4) that we call SpyChIP. Previous *in vitro* work demonstrated that the 15  
67 amino acid SpyTag peptide spontaneously and rapidly forms a covalent isopeptide bond with a  
68 specific binding partner, a 17 kD protein named SpyCatcher (4). We reasoned that if SpyTag and  
69 SpyCatcher were also able to form a covalent bond in nuclei, a TF fused with SpyTag could be  
70 covalently linked to epitope tagged spyCatcher expressed specifically in the target cell type. ChIP  
71 against the epitope on spyCatcher would decode cell type-specific TF-DNA occupancy without tissue  
72 dissociation and nuclei sorting (Fig. 1A). Indeed, applying SpyChIP to the *Drosophila* Hox protein Ubx

73 verified this approach and revealed many cell type-specific Ubx-DNA binding events in the haltere  
74 imaginal disc.

## 76 Results

77 **SpyTag and SpyCatcher form a covalent isopeptide bond *in vivo*.** We first tested whether  
78 SpyTag and SpyCatcher form a covalent isopeptide bond *in vivo*. In the nuclei of *Drosophila* embryos,  
79 we co-expressed 3xFLAG-SpyCatcher with GFP that was tagged with SpyTag at either the N- or C-  
80 terminus, and the V5 tag at the other end. Western blot against the 3xFLAG tag and the V5 tag was  
81 performed to follow SpyCatcher and GFP respectively. Consistent with previous *in vitro* results, we  
82 detected the formation of a larger molecular weight protein that is roughly the predicted size of  
83 SpyCatcher fused to GFP (**Fig. 2A**), indicating successful covalent bond formation in *Drosophila*  
84 nuclei.

85 We next piloted SpyChIP by characterizing the occupancy of the Hox protein Ubx (Ultrabithorax) in  
86 different cell types in *Drosophila* haltere imaginal discs. Ubx is a selector TF that determines the  
87 identity of the 3<sup>rd</sup> thoracic (T3) and 1<sup>st</sup> abdominal (A1) segments (5). We probed the genome-wide  
88 binding of Ubx in the *Drosophila* haltere imaginal disc, which gives rise to the dorsal T3 segment of  
89 the adult fly, including the haltere, an appendage critical for flight. Mutations in *Ubx* result in the  
90 famous four-winged *bithorax* homeotic transformation, in which the haltere-bearing T3 segment of the  
91 adult is transformed into a second copy of the wing-bearing T2 segment (**Fig. 1B**) (5). During wild  
92 type metamorphosis, the center of the haltere imaginal disc gives rise to most of the haltere  
93 appendage, while the periphery of the disc gives rise to the dorsal T3 body wall and the proximal  
94 haltere structures (**Fig. 1B**) (6).

95 We fused the SpyTag to the N-terminus of Ubx at the endogenous *Ubx* locus in a scarless manner  
96 (**Fig S1 and Methods**), and expressed 3xFLAG-SpyCatcher with 2 cell type-specific Gal4 drivers: *tsh-*

97 *Gal4*, active in the proximal haltere disc, and *nub-Gal4*, expressed in the distal haltere disc. We also  
98 used the ubiquitous driver *ubi-Gal4*, which should mimic a standard whole tissue ChIP experiment  
99 (Fig. 1B and Fig. S2). Western blotting with an anti-Ubx antibody showed that the apparent molecular  
100 weight of SpyTag-Ubx increased when SpyCatcher was expressed by all three drivers, and that the  
101 increase in size was consistent with the molecular weight of 3XFLAG-SpyCatcher (Fig. 2B). When  
102 *ubi-Gal4* was used to express SpyCatcher, most of the endogenous Ubx shifted to the larger  
103 molecular weight (Fig. 2B), indicating efficient covalent bond formation between SpyCatcher and  
104 SpyTag-Ubx *in vivo* in *Drosophila* nuclei. As expected, when SpyCatcher was expressed with the  
105 other two drivers, less Ubx was shifted to the larger size, consistent with their more limited expression  
106 domains within the haltere disc.

107  
108 **SpyChIP faithfully captures TF-DNA occupancy.** ChIP-seq experiments were then performed  
109 when 3xFLAG-SpyCatcher was expressed by each of the three Gal4 drivers, using chromatin  
110 prepared from whole haltere discs and anti-FLAG antibody. All Ubx::SpyChIP replicates revealed  
111 thousands of peaks, consistent with successful ChIP experiments. To assess how well SpyChIP  
112 works, we compared *ubi-Gal4*>Ubx::SpyChIP results with 2 independent whole haltere disc Ubx ChIP  
113 datasets. One such dataset was generated by using the same anti-FLAG antibody as we used in all  
114 Ubx::SpyChIP experiments to profile Ubx binding in 3xFLAG-Ubx flies, which was previously created  
115 by inserting the 3xFLAG tag into the endogenous *Ubx* locus in a scarless manner (7). The other  
116 whole disc Ubx ChIP dataset was obtained by probing wild type flies using anti-Ubx antibody (8). The  
117 average enrichment of sequencing tags in all called peaks relative to a random set of genomic  
118 regions can be used as an approximation of a ChIP's signal-to-noise ratio. We found that this  
119 enrichment is slightly higher for Ubx ChIP with anti-FLAG antibody than with anti-Ubx antibody (Fig.  
120 S3A). All Ubx::SpyChIP experiments have similar enrichment, which is essentially the same as the  
121 enrichment of Ubx ChIP with anti-Ubx antibody, but is slightly lower than anti-FLAG Ubx ChIP (Fig.

122 **S3A**). We conclude that overall, the signal-to-noise ratio of SpyChIP is comparable to that of standard  
123 ChIP experiments.

124 In addition, pair-wise comparisons between *ubi-Gal4>Ubx::SpyChIP* and both whole haltere disc Ubx  
125 ChIPs show good agreement (**Fig. 3A and Fig. S3B**). The correlation between *ubi-*  
126 *Gal4>Ubx::SpyChIP* and a standard Ubx ChIP is similar to the correlation between two Ubx ChIP  
127 biological replicates (**Fig. S3B**), indicating that SpyChIP faithfully captures genome-wide Ubx  
128 occupancy.

129 We considered the possibility that, when SpyCatcher is expressed with *nub-Gal4* or *tsh-Gal4*, there  
130 may be a large excess of SpyCatcher compared to SpyTag-Ubx. Such an excess could result in a  
131 pool of unbound SpyCatcher that, during chromatin preparation and immunoprecipitation, might bind  
132 to SpyTag-Ubx from cells outside the domain targeted by Gal4, thus potentially compromising  
133 specificity. To limit this from happening, an excess of synthetic SpyTag peptide was added to quench  
134 unoccupied SpyCatcher in all experiments except for *nub-Gal4>Ubx::SpyChIP* replicate 1, which  
135 allowed us to assess the effect of quenching. The comparison between *nub-Gal4>Ubx::SpyChIP*  
136 replicates with or without quenching did not reveal significant differences (**Fig. S3C**). This could mean  
137 that an excess of SpyCatcher does not decrease the specificity of SpyChIP or, in this case, it could  
138 be due to the fact that the endogenous Ubx levels are sufficiently high in Nub+ cells (Delker et al.,  
139 2019) so that there is not an excess of unbound SpyCatcher.

140

141 **SpyChIP identifies cell type-specific TF-DNA binding events.** We next inspected Ubx::SpyChIP  
142 results genome-wide. Peaks shared between Tsh+ and Nub+ cells, as well as those specific to each  
143 cell type, could be readily identified (**Fig. 3A**). Genome-wide comparison between *tsh-*  
144 *Gal4>Ubx::SpyChIP* and *nub-Gal4>Ubx::SpyChIP* results identified 175 and 1888 Ubx binding events  
145 that are specific to either the Tsh+ domain or Nub+ domain, respectively. In addition, there are 2389

146 binding events that are shared by both datasets (Fig. 3B). The significant asymmetry in the numbers  
147 of Tsh+ and Nub+ cell-specific Ubx binding events is surprising, but is consistent with the observation  
148 that for both the wing and haltere discs, several fold more differentially accessible loci were observed  
149 in Nub+ cells than in Tsh+ cells (8).

150 Ubx can bind to DNA either as a monomer or as a heterodimer with its cofactor Extradenticle (Exd),  
151 and the ubiquitous Exd protein is only nuclear and available as a Hox cofactor when another protein,  
152 Homothorax (Hth), is present (9). In the haltere disc, Hth is expressed in all Tsh+ cells and some  
153 Nub+ cells (8) (Fig. 1B). Consistent with the large number of Nub+, Hth- cells, a Ubx monomer motif  
154 is enriched in Nub+ cell-specific Ubx-bound peaks. In contrast, an Exd-Ubx heterodimer motif is  
155 enriched in Tsh+ cell-specific Ubx binding events, as well as in peaks shared by the two cell types  
156 (Fig. 3B and Fig. S4B). As expected, both types of Ubx motifs are enriched in the *ubi-*  
157 *Gal4>Ubx::SpyChIP* peaks (Fig. S4A). These results are consistent with previous results showing that  
158 Ubx binds with or without cofactors, depending on the region of the haltere disc (8), and demonstrate  
159 that SpyChIP is able to capture cell type-specific TF-DNA binding events.

160  
161 **The role of cell type-specific Ubx binding.** Recently, Loker *et. al.* characterized the genome-wide  
162 chromatin accessibility in Tsh+ and Nub+ cells of the haltere and the serially homologous wing  
163 imaginal discs (8). Given the cell type-specific Ubx binding data described here, we asked if there is  
164 any correlation between cell type-specific chromatin accessibility and cell type-specific Ubx binding.  
165 Notably, sites in the haltere that have Tsh>Nub Ubx binding also tend to be more accessible in Tsh+  
166 cells compared to Nub+ cells, not only in the haltere disc, but also in the wing disc (Fig. 4A and 4B).  
167 Since Ubx is expressed in the haltere disc but not in the wing disc, this pattern suggests that the  
168 Tsh>Nub Ubx binding sites gain accessibility in Tsh+ cells by a mechanism that is independent of

169 Ubx binding. Similarly, many, but not all of the 1888 Nub>Tsh Ubx binding sites have biased  
170 accessibility in Nub+ cells compared to Tsh+ cells, in both the haltere and wing (Fig. 4C and 4D).  
171 Finally, we inspected Ubx::SpyChIP patterns at selected Ubx downstream *cis*-regulatory modules  
172 (CRMs). For simplicity, we focused on CRMs that only require Ubx function in Nub+ cells and also  
173 have Ubx ChIP peaks from whole haltere disc experiments, suggesting that they are direct Ubx  
174 targets. We included in our analysis *sal1.1* (10) and *kn01* (11), as well as 4 additional CRMs recently  
175 identified by Loker *et. al.* based on their differential accessibility in haltere Nub+ cells compared to  
176 wing Nub+ cells (8). Ubx acts as either an activator or a repressor of each CRM (Fig. 5). Among the 6  
177 selected CRMs, 4 have Ubx binding only in Nub+ cells, while the other 2 have Ubx binding in both  
178 Tsh+ and Nub+ cells. These patterns of binding and regulation are consistent with the existence of  
179 multiple modes of Ubx regulation. For example, for CRM Rep-6, which is activated by Ubx in Nub+  
180 cells, Ubx binding is observed in both Tsh+ and Nub+ cells and is apparently not sufficient for  
181 activation of this CRM. In contrast, Ubx only binds to CRM Rep-7 in Nub+ cells, where it also acts as  
182 an activator, raising the possibility that the absence of Ubx binding in Tsh+ cells is important for CRM  
183 activation only in Nub+ cells.

184

## 185 Discussion

186 Characterizing cell type-specific binding is critical for understanding a TF's *in vivo* functions. The  
187 SpyChIP technique we describe in this study overcomes several major limitations of existing  
188 approaches. Because SpyChIP does not depend on tissue dissociation or nuclei sorting, it is  
189 especially suitable for tissues with limited availability or those that are difficult to dissociate. Contrary  
190 to the lower temporal resolution associated with DamID based techniques, the temporal resolution of  
191 SpyChIP has as high a temporal resolution as standard ChIP and is therefore desirable in analyzing  
192 tissues undergoing dynamic rearrangements. We demonstrated the efficacy of SpyChIP by



193 successfully obtaining cell type-specific Ubx ChIP results from the *Drosophila* haltere discs. These  
194 tiny tissues must be manually dissected and are therefore difficult to obtain in large quantity. Imaginal  
195 discs also undergo rapid cellular rearrangements during metamorphosis. In fact, to our knowledge,  
196 before our study, no cell type-specific TF-DNA occupancy results have been reported from any  
197 *Drosophila* imaginal discs. The covalent bond between Spytag and SpyCatcher is robust to diverse  
198 conditions such as temperature and pH (4), thus SpyChIP is likely to be applicable in most tissues  
199 and in most organisms. If the target cell type represents a very small fraction in the complex tissue,  
200 SpyChIP may be combined with crude cell/nuclei sorting to partially enrich the target cells. In  
201 SpyChIP, cell type-specificity is genetically encoded, it is thus not necessary to obtain a highly pure  
202 cell population by sorting, which is usually associated with lower yields.

203 Although a positive correlation is often observed between differential chromatin accessibility and  
204 differential transcription factor binding, it is usually difficult to deduce the cause versus the  
205 consequence. With the aid of Ubx::SpyChIP, we were able to rule out that Tsh>Nub Ubx binding  
206 caused Tsh>Nub chromatin accessibility. Conversely, our results suggest that Tsh>Nub chromatin  
207 accessibility is permissive for Tsh>Nub Ubx binding pattern. It is generally believed that the same TF,  
208 especially a selective TF like Ubx, can regulate its downstream CRMs using different modes of  
209 action. However, it is not easy to demonstrate diverse mechanisms. Our Ubx::SpyChIP results show  
210 that Ubx binding is not always sufficient for CRM activation, suggesting the presence of multiple  
211 mechanisms that act in a CRM-specific manner.

212 Finally, we suggest that the SpyTag/SpyCatcher technology has the potential for many additional *in*  
213 *vivo* applications beyond SpyChIP. We envision that the covalent interaction between Spytag and  
214 SpyCatcher can be combined with a variety of other techniques, such as HiChIP (12) and bioID (13),  
215 to achieve cell type-specificity without dissociation or cell/nucleus sorting. Moreover, once a factor  
216 has been fused with SpyTag by genome modification, it can be easily tagged with any peptide of  
217 interest, such as different epitopes, fluorescent proteins, or enzymes. Also noteworthy is that SpyTag

and SpyCatcher are not the only pair of peptides that form a covalent bond when they interact: other orthogonal pairs have been reported to form covalent bonds *in vitro* (14). Therefore, there are many possibilities of *in vivo* applications of these covalent interacting peptide pairs.

## Materials and Methods

**New fly strains.** All plasmids were generated by standard procedures, and transgenic flies were generated by integrating the plasmids into selected attP sites via phiC31 integrase mediated site-specific recombination.

The scarless *SpyTag-Ubx* allele was generated using a method we previously described (7). Briefly, a fragment of *Ubx* genomic DNA containing the *SpyTag* inserted at the N-terminal end of the *Ubx* ORF was integrated into the endogenous *Ubx* locus by phiC31 integrase mediated site-specific recombination. Double-stranded DNA breaks were then introduced to stimulate homologous recombination and repair the endogenous *Ubx* to the final scarless *SpyTag-Ubx* allele. The landing site for site-specific recombination in the *Ubx* locus has been described in detail, and the donor plasmid was generated similarly as before (7). The *SpyTag* sequence was inserted by overlapping extension PCR. Multiple independent *SpyTag-Ubx* alleles were generated, verified by southern blotting, and fully sequenced to make sure there were no unwanted mutations. Southern blotting was performed using DIG High Prime DNA Labeling and Detection Starter Kit II (Roche 11585614910) and DIG Wash and Block Buffer Set (Roche 11585762001) according to manufacturer's instructions. The *Ubx* 5' and *Ubx* 3' probes were described before (7). DNA Molecular Weight Marker II, DIG-labeled (Roche 11218590910) was used as the marker.

**Western blotting.** Western blotting was performed using standard procedure. For embryo samples, embryos from desired crosses were collected overnight at 25°C, and transferred to a 1ml Wheaton homogenizer (not dechorionated). An appropriate volume of 4xSDS-PAGE loading dye (with 10%  $\beta$ -

242 mercaptoethanol) was added (100ul of the loading dye per ~10ul of settled embryos), and the  
243 embryos were completely homogenized. The homogenized materials were then transferred to 1.5ml  
244 tubes. For each haltere disc sample, 35-55 discs were dissected in PBS+1% BSA on ice, and  
245 transferred to a 1.5ml tube containing 0.5ml of PBS+1% BSA. The supernatant was removed, and  
246 100ul of 4xSDS-PAGE loading dye (with 10%  $\beta$ -mercaptoethanol) was added. The haltere discs were  
247 then completely homogenized with a disposable pestle. The homogenized materials were heated at  
248 95°C for 6-7 minutes and chilled on ice. The samples were then spun at room temperature at max  
249 speed for 5 minutes, and the supernatant was loaded on SDS-PAGE. After SDS-PAGE, the proteins  
250 were transferred to PVDF membrane using routine procedure. The 3xFLAG epitope was detected  
251 using anti-FLAG M2-HRP (sigma A8592, 1:10,000), and the V5 epitope was detected using mouse  
252 anti-V5 antibody (Invitrogen R96025, 1:5,000) followed by goat anti-mouse IgG-HRP (Jackson  
253 ImmunoResearch 115-035-003, 1:25,000), or with rabbit anti-V5 antibody (abcam ab9116, 1:5,000)  
254 followed by donkey anti-rabbit IgG-HRP (Jackson ImmunoResearch 711-036-152, 1:5,000). The Ubx  
255 protein was detected using monoclonal mouse anti-Ubx FP3.38 (DSHB) at 1:100, followed by the  
256 same goat anti-mouse IgG-HRP secondary antibody at 1:10,000. SuperSigna West Pico PLUS  
257 Chemiluminescent Substrate (Thermo Scientific 34580) was used as the substrate to visualize the  
258 bands.

259 **Chromatin preparation.** The larvae for Ubx::SpyChIP experiments were prepared by crossing  
260 *SpyTag-Ubx/(TM6B)* females to *Gal4/(CyO, GFP); attP2-UAS-3xFLAG-NLS-SpyCatcher, SpyTag-*  
261 *Ubx/(TM6B)* males. 3 different *Gal4* lines: *tsh-Gal4*, *nub-Gal4* and *ubi-Gal4* were used. *TM6B-* and  
262 *GFP-* larvae were selected for dissection, and 100 to 150 larvae were dissected for each replicate.  
263 Homozygous *3xFLAG-Ubx (7)* larvae were also used for whole haltere disc ChIP experiment. The  
264 larvae were pulled apart in PBS and the heat parts were inverted. The inverted heat parts were  
265 crosslinked in 10ml of crosslinking solution (10mM HEPES pH8.0, 100mM NaCl, 1mM EDTA pH8.0,  
266 0.5mM EGTA pH8.0, 1% formaldehyde) for 10 minutes at room temperature. After crosslinking, 1ml

267 of 2.5M glycine was added and the samples were hand mixed for 30 seconds. The samples were  
268 then washed with 10ml of quenching solution (1xPBS, 125mM glycine, 0.1% Triton X-100) for at least  
269 6 minutes at room temperature, followed by 2 more washes with 10ml of ice-cold buffer A (10mM  
270 HEPES pH8.0, 10mM EDTA pH8.0, 0.5mM EGTA pH8.0, 0.25% Triton X-100, with proteinase  
271 inhibitor cocktail) at 4°C, 10 minutes each. The gut, salivary glands and fat bodies were then moved  
272 from all head parts in buffer A. Next, the samples were washed twice with 10ml of ice-cold buffer B  
273 (10mM HEPES pH8.0, 200mM NaCl, 1mM EDTA pH8.0, 0.5mM EGTA pH8.0, 0.01% Triton X-100,  
274 with proteinase inhibitor cocktail) at 4°C, 10 minutes each. The haltere discs were dissected from the  
275 head parts in buffer B, and were transferred to a 15ml falcon tube. The supernatant was removed,  
276 and 0.9ml of buffer C (10mM HEPES pH8.0, 1mM EDTA pH8.0, 0.5mM EGTA pH8.0, 1% Triton X-  
277 100, with proteinase inhibitor cocktail) was added. The discs were then sonicated with Branson  
278 Sonifier 450 on ice at 15% amplitude for 12 minutes (15 seconds on/30 seconds off). The sonicated  
279 samples were spun at max speed at 4°C for 10 minutes, and the supernatant was transferred to new  
280 tubes, flash frozen in liquid N<sub>2</sub>, and stored at -80°C until the next step.

281 The SpyTag stock solution was prepared by dissolving synthetic SpyTag (Genscript custom peptide  
282 synthesis service) in water at a concentration of 1mM. For replicates in which synthetic SpyTag was  
283 used to quench unoccupied SpyCatcher molecules, SpyTag was used at a final concentration of  
284 10uM in buffer B when taking haltere discs from the head parts, and in buffer C.

285 **Chromatin immunoprecipitation.** ChIP was performed after all chromatin samples were prepared.  
286 The chromatin samples were thawed on ice, and to each sample, 1/4 volume of 5x chromatin dilution  
287 buffer (50mM Tris-HCl pH8.0, 5mM EDTA pH8.0, 750mM NaCl, 1% Triton X-100) was added to  
288 adjust buffer condition, as well as appropriate volume of 100x Halt Protease Inhibitor Cocktail, EDTA-  
289 Free (Thermo Scientific 87785). Next, 10 µg of normal mouse IgG was added to each sample for  
290 preclearing, and the samples were rotated at 4°C for 1 hour. 40 µl of protein G agarose beads  
291 suspension (Roche 11243233001) (settled beads volume 20 µl) was used for each ChIP and

292 preclearing reaction. The beads were washed twice with 1 ml of RIPA buffer (10mM Tris-HCl pH8.0,  
293 1mM EDTA pH8.0, 150mM NaCl, 1% Triton X-100) for 10 minutes each at 4°C with rotation, and  
294 were blocked with blocking solution (RIPA + 1.25mg/ml BSA (Sigma A2153) + 0.25mg/ml tRNA  
295 (Roche 10109517001)) for at least 1 hour at 4°C with rotation. The chromatin-normal IgG mixtures  
296 were added to blocked beads for preclearing, and were rotated at 4°C for 1 hour. The precleared  
297 chromatin was separated from beads by centrifugation. 100ul of each precleared chromatin was  
298 taken and stored at -80°C as input. 12.5µl of 100 mg/ml BSA, 25µl of 10 mg/ml tRNA, and 10ug of  
299 anti-FLAG M2 antibody (Sigma F1804) were added to the rest of precleared chromatin. The samples  
300 were rotated at 4°C overnight.

301 In the next day, the chromatin samples were added to blocked beads, and were rotated at 4°C for 2  
302 hours. The beads were briefly rinsed with RIPA buffer, and were subjected to the following 10-minute  
303 washes at 4°C: 2 washes with RIPA buffer, 1 wash with high salt RIPA buffer (10mM Tris-HCl pH8.0,  
304 1mM EDTA pH8.0, 350mM NaCl, 1% Triton X-100), 1 wash with LiCl buffer (10mM Tris-HCl pH8.0,  
305 1mM EDTA pH8.0, 250mM LiCl, 0.1% IGEPAL CA-630), and 1 wash with TE buffer (10mM Tris-HCl,  
306 1mM EDTA, pH8.0, filtered). All rinses washes were performed with 1ml of ice-cold buffer. After the  
307 TE wash, the beads were resuspended in 500µl of TE, and the input samples were also adjusted to  
308 500µl with TE buffer. Next, 5µl of 5M NaCl, 12.5µl of 20% SDS, and 10µl of 1mg/ml RNase (Sigma  
309 R5503) were added to each ChIP and input sample, and the samples were incubated at 37°C for 30  
310 minutes with rotation. 20µl of 20mg/ml proteinase K (Roche 03115836001) was then added to each  
311 sample. The samples were rotated at 55°C for 2 to 3 hours, and then at 65°C overnight for  
312 decrosslinking.

313 In the third day, all ChIP samples were centrifuged at room temperature at max speed for 5 minutes,  
314 and the supernatant was transferred to new tubes. 100µl of 3M sodium acetate (pH 5.2) was added to  
315 each sample, and the samples were extracted with phenol:chloroform (1:1) and then with chloroform.  
316 1µl of 20mg/ml glycogen (Roche 10901393001) was then added to each sample, and the DNA was

317 purified by isopropanol precipitation. 30µl of 10mM Tris buffer, pH8.0 was used to dissolved the DNA  
318 pellet of each sample. The purified DNA was quantified using Qubit dsDNA HS Assay Kit (Thermo  
319 Fisher Scientific Q32854)

320 **ChIP-seq library preparation and sequencing.** ChIP-seq libraries were prepared using the  
321 NEBNext Ultra™ II DNA Library Prep Kit (NEB E7103) with modifications. 1-2 ng of ChIP DNA and 8-  
322 10 ng of input DNA was used as starting materials. No size selection was performed after adaptor  
323 ligation, and 11 PCR cycles were performed for all libraries. After PCR amplification, instead of  
324 purifying DNA using 0.9x of beads, the following purification protocol was used: 1.8x of beads was  
325 used to purify DNA from the PCR reactions. The DNA was eluted in 52ul of elution buffer, and 50ul  
326 was transferred to new tubes. The purified DNA was then subjected to size selection (0.65x for first  
327 bead addition, and 0.25x for second bead addition). The DNA was then eluted with 17ul of elution  
328 buffer, and 15ul was transferred to new tubes. The sizes of the libraries were determined by  
329 bioanalyzer, using Bioanalyzer High Sensitivity DNA Analysis (Agilent 5067-4626), and the libraries  
330 were quantified by Qubit dsDNA HS Assay Kit (Thermo Fisher Scientific Q32854). The libraries were  
331 sequenced using illumina Nextseq 500 sequencer.

332 **ChIP-seq data analysis.** Mapping and peak calling were performed using tools on galaxy.eu. The  
333 reads were mapped to *Drosophila* genome build dm6 by bowtie2 (15) using default settings, and peak  
334 calling was performed by MACS2 (16) with the following parameters: --nomodel --extsize 200 (all  
335 other parameters were default). Differential binding analysis was performed using DiffBind (17),  
336 following default procedures. Heatmaps were generated using deeptools2 (18) (also on galaxy.eu),  
337 and scatter plots were generated using the R package ggplot2. *de novo* motif searches were  
338 performed using homer (19), and all parameters were default except -size 80.

339

340

341 **Acknowledgement**

342 We want to thank Nicolas Gompel for the fly image in Fig. 1B, and we thank all members in the Mann  
343 lab for discussions. This study was supported by NIH grants R35 GM118336 to R. S. M.

344

345 **Author contributions**

346 S. F. conceived the study, designed the study with input from R. S. M., and performed all the  
347 experiments. Both authors analyzed the results and wrote the manuscript.

348

349 **Competing interest statement**

350 The authors declare no competing financial interest.

351

352

353

354

355

356

357

358

359

360

361

## References

- 362 1. Park PJ (2009) ChIP–seq: advantages and challenges of a maturing technology. *Nature Reviews Genetics*  
363 10(10):669-680.
- 364 2. Bonn S, *et al.* (2012) Tissue-specific analysis of chromatin state identifies temporal signatures of enhancer  
365 activity during embryonic development. *Nature Genetics* 44(2):148-156.
- 366 3. Southall Tony D, *et al.* (2013) Cell-Type-Specific Profiling of Gene Expression and Chromatin Binding without Cell  
367 Isolation: Assaying RNA Pol II Occupancy in Neural Stem Cells. *Developmental Cell* 26(1):101-112.
- 368 4. Zakeri B, *et al.* (2012) Peptide tag forming a rapid covalent bond to a protein, through engineering a bacterial  
369 adhesin. *Proceedings of the National Academy of Sciences* 109(12):E690.
- 370 5. Lewis EB (1963) Genes and Developmental Pathways. *American Zoologist* 3(1):33-56.
- 371 6. Cohen SM (1993) Imaginal disc development. *The Development of Drosophila melanogaster.*, eds Bate M &  
372 Martinez-Arias A (Cold Spring Harbor Laboratory Press, New York), Vol 2, pp 747-842.
- 373 7. Feng S, Lu S, Grueber WB, & Mann RS (2021) Scarless engineering of the Drosophila genome near any site-  
374 specific integration site. *Genetics* 217(3).
- 375 8. Loker R, Sanner JE, & Mann RS (2021) Cell-type-specific Hox regulatory strategies orchestrate tissue identity.  
376 *Current Biology* 31(19):4246-4255.e4244.
- 377 9. Merabet S & Mann RS (2016) To Be Specific or Not: The Critical Relationship Between Hox And TALE Proteins.  
378 *Trends in genetics : TIG* 32(6):334-347.
- 379 10. Galant R, Walsh CM, & Carroll SB (2002) Hox repression of a target gene: extradenticle-independent, additive  
380 action through multiple monomer binding sites. *Development (Cambridge, England)* 129(13):3115-3126.
- 381 11. McKay Daniel J & Lieb Jason D (2013) A Common Set of DNA Regulatory Elements Shapes *Drosophila*  
382 Appendages. *Developmental Cell* 27(3):306-318.
- 383 12. Mumbach MR, *et al.* (2016) HiChIP: efficient and sensitive analysis of protein-directed genome architecture.  
384 *Nature methods* 13(11):919-922.
- 385 13. Long S, Brown KM, & Sibley LD (2018) CRISPR-mediated Tagging with BirA Allows Proximity Labeling in  
386 *Toxoplasma gondii*. *Bio Protoc* 8(6):e2768.
- 387 14. Veggiani G, *et al.* (2016) Programmable polyproteins built using twin peptide superglues. *Proceedings of the*  
388 *National Academy of Sciences of the United States of America* 113(5):1202-1207.
- 389 15. Langmead B & Salzberg SL (2012) Fast gapped-read alignment with Bowtie 2. *Nature methods* 9(4):357-359.
- 390 16. Zhang Y, *et al.* (2008) Model-based Analysis of ChIP-Seq (MACS). *Genome biology* 9(9):R137.
- 391 17. Ross-Innes CS, *et al.* (2012) Differential oestrogen receptor binding is associated with clinical outcome in breast  
392 cancer. *Nature* 481:389.
- 393 18. Ramírez F, *et al.* (2016) deepTools2: a next generation web server for deep-sequencing data analysis. *Nucleic*  
394 *Acids Research* 44(W1):W160-W165.
- 395 19. Heinz S, *et al.* (2010) Simple combinations of lineage-determining transcription factors prime cis-regulatory  
396 elements required for macrophage and B cell identities. *Mol Cell* 38(4):576-589.

397



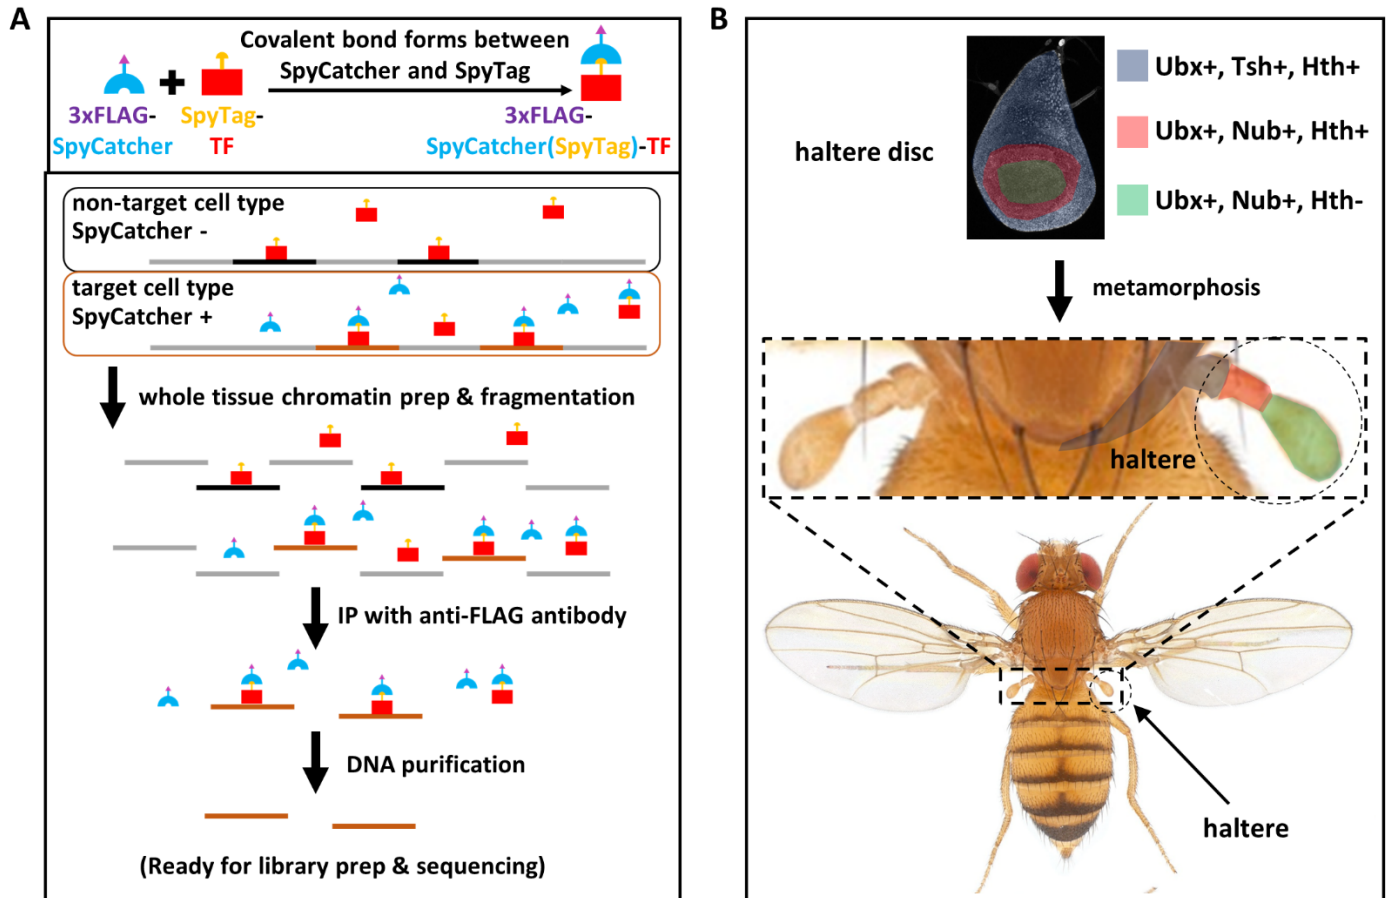

398

399

400

### Fig. 1. Overview of SpyChIP strategy and haltere development.

401

402

403

404

**A.** A TF of interest is tagged with SpyTag by genome engineering. Upon cell-type specific expression of 3xFLAG-SpyCatcher, a covalent bond is formed between SpyTag and SpyCatcher, allowing chromatin bound by the TF to be immunoprecipitated using antibody against the 3xFLAG epitope on SpyCatcher.

405

406

407

408

**B.** Schematic of the development from larval haltere imaginal disc to adult T3 segment. During metamorphosis, the center of the haltere disc everts and becomes the distal haltere. Ubx is expressed in the entire haltere disc. The expression domains of Tsh, Nub and Hth in the haltere disc are labeled, and the corresponding adult structures are indicated by the same colors.

409

410

411

412

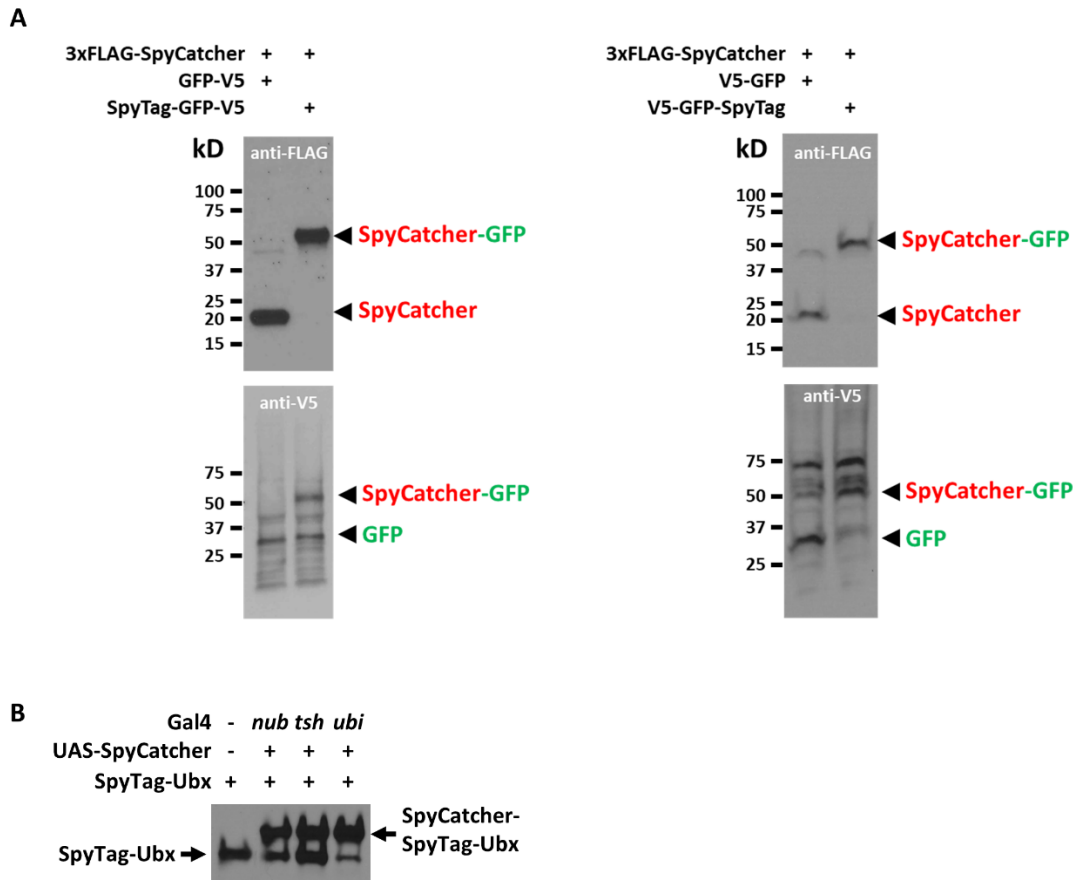

413

414 **Fig. 2. SpyTag and SpyCatcher form covalent isopeptide bond *in vivo*.**

415 **A.** Western blot analysis of total embryo lysates using anti-FLAG antibody and anti-V5 antibody. The  
 416 predicted molecular weights of relevant proteins are shown below. The embryos were F1 embryos  
 417 from the following crosses:

418 Left: SpyTag at N-terminus of GFP: *En-Gal4/(CyO)*; *MKRS/TM6B* males crossed to *attP40-UAS-*  
 419 *3xFLAG-NLS-SpyCatcher*; *attP2-UAS-(SpyTag)-GFP-V5* females.

420 Right: SpyTag at C-terminus of GFP: *En-Gal4/(CyO)* females crossed to *attP40-UAS-3xFLAG-NLS-*  
 421 *SpyCatcher*; *attP2-UAS-V5-GFP-(SpyTag)* males.

422 In both cases, only GFP that is tagged with SpyTag shifts to a higher molecular weight after  
 423 expression of 3xFLAG-SpyCatcher.

424 **B.** Anti-Ubx western blot analysis of whole haltere discs. The genotypes of the lanes from left to right  
 425 are: 1) *SpyTag-Ubx/SpyTag-Ubx*, 2) *nub-Gal4/+*; *UAS-SpyCatcher*, *SpyTag-Ubx/SpyTag-Ubx*, 3) *tsh-*  
 426 *Gal4/+*; *UAS-SpyCatcher*, *SpyTag-Ubx/SpyTag-Ubx*, and 4) *ubi-Gal4/+*; *UAS-SpyCatcher*, *SpyTag-*  
 427 *Ubx/SpyTag-Ubx*. Depending on the driver, different amounts of SpyTag-Ubx are shifted to a higher  
 428 molecular weight upon co-expression with SpyCatcher.

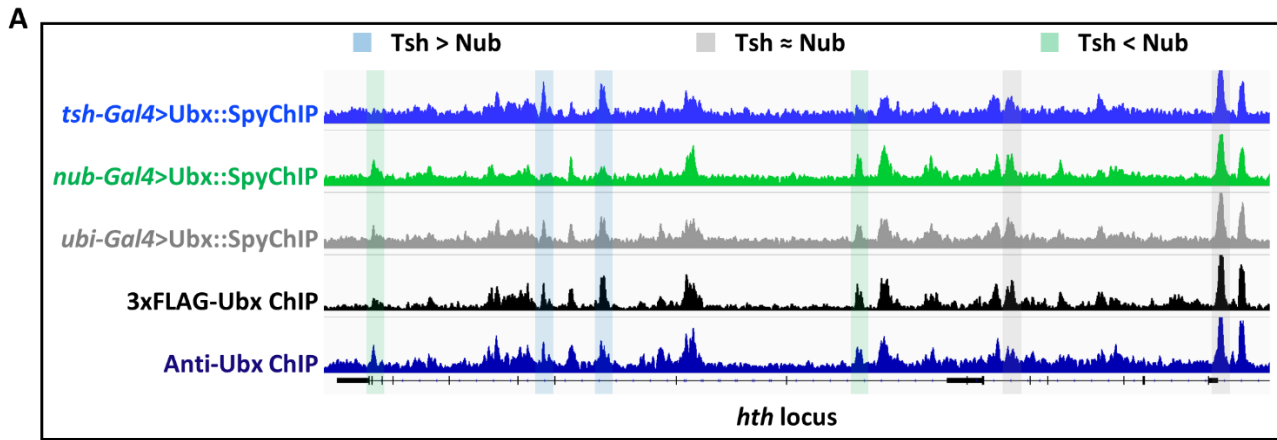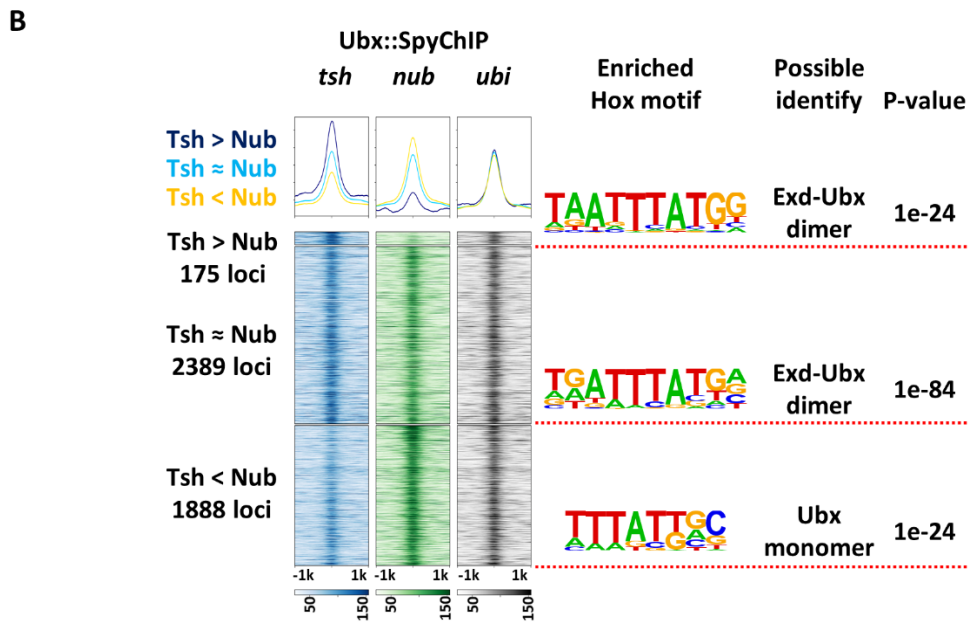

429

430

**Fig. 3. SpyChIP identifies genome-wide and cell type-specific TF binding events.**

431

**A.** SpyChIP results at the *hth* locus, which was chosen as an example. Examples of different classes of peaks are color coded: blue: Tsh Ubx::SpyChIP > Nub Ubx::SpyChIP, grey: Tsh Ubx::SpyChIP ≈ Nub Ubx::SpyChIP, and green: Tsh Ubx::SpyChIP < Nub Ubx::SpyChIP. Three SpyChIP tracks and two independent whole haltere disc Ubx ChIP tracks are shown. The 3xFLAG-Ubx (7) ChIP used the same anti-FLAG antibody as in all SpyChIP experiments. For comparison, the anti-Ubx ChIP track used an antibody directed against Ubx (8).

437

**B.** Heatmaps and histograms of Tsh > Nub, Tsh ≈ Nub and Tsh < Nub Ubx::SpyChIP loci plotted for *tsh-Gal4*>Ubx::SpyChIP, *nub-Gal4*>Ubx::SpyChIP and *ubi-Gal4*>Ubx::SpyChIP. Hox-related motifs significantly enriched in each class of loci are indicated. For a complete list of enriched motifs, see Fig. S4.

440

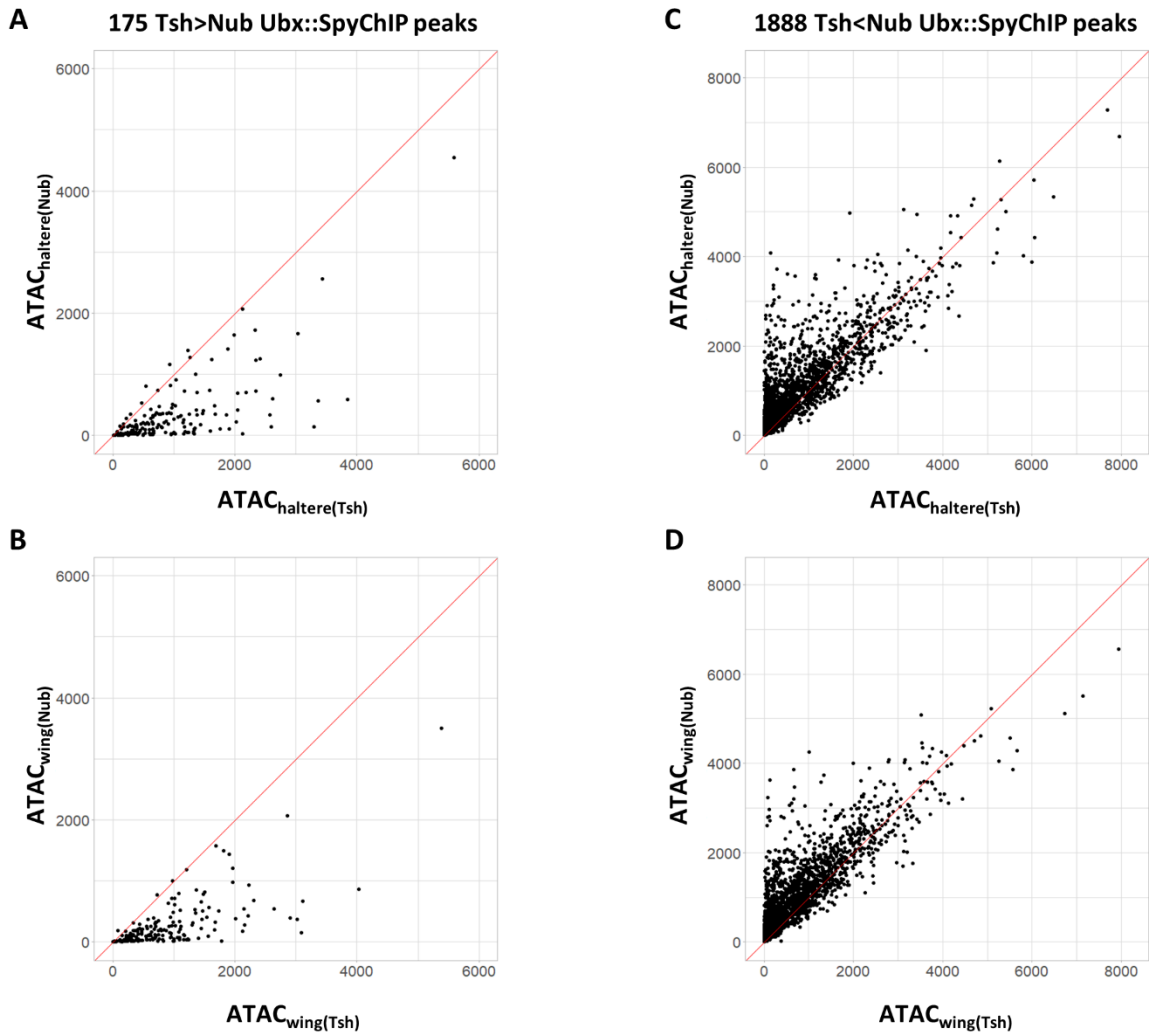

441

442

443

**Fig. 4. Relationship between chromatin accessibility and TF-DNA binding revealed by SpyChIP**

444

445

446

447

Scatter plots comparing chromatin accessibility of Tsh+ and Nub+ cells in 175 Tsh > Nub Ubx::SpyChIP peaks (A and B), or in 1888 Tsh < Nub Ubx::SpyChIP peaks (C and D). The Tsh+ vs. Nub+ cells were compared in both the haltere disc (A and C) and the wing disc (B and D). Chromatin accessibility data are from (8).

448

449

450

451

452

CRMs from Loker *et al.*

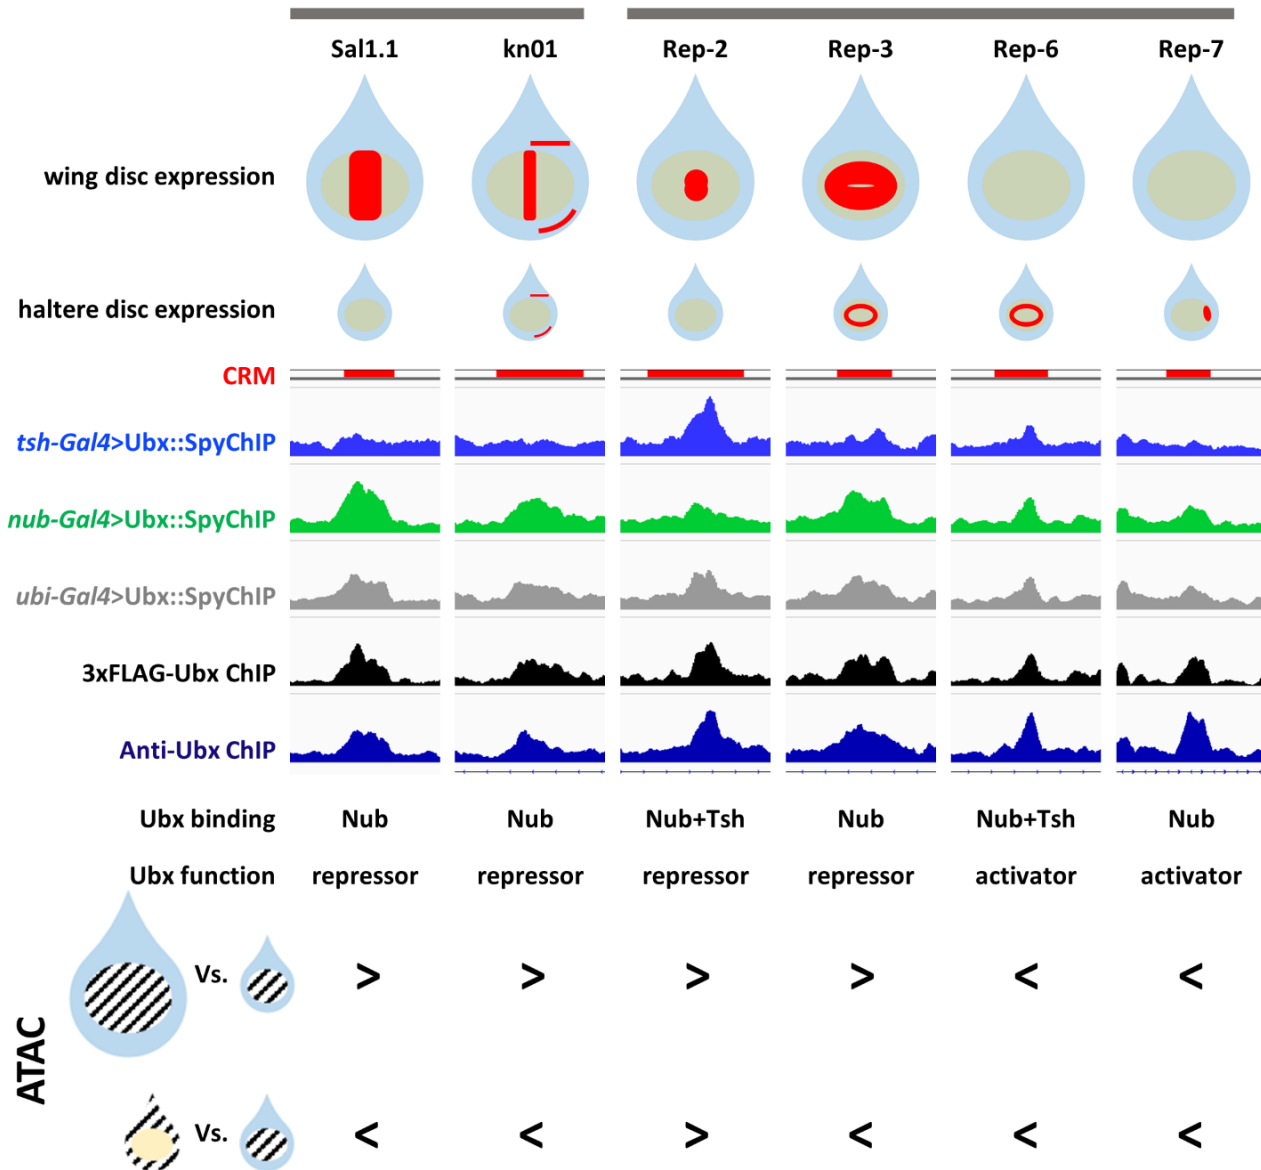

Fig. 5. SpyChIP reveals distinct Ubx regulatory strategies.

Summary of Ubx binding, expression patterns and chromatin accessibility for selected Ubx-targeted CRMs. These CRMs were chosen because they bind Ubx and have been shown to require *Ubx* function, either as a repressor or activator as indicated, in Nub+ cells (8). The top two rows are schematics of the CRM expression patterns in wing and haltere discs. Light blue and yellow colors mark the Tsh+ and Nub+ cells, respectively; red indicates CRM activity. Below are five genome browser views showing the Ubx::SpyChIP signals and whole disc Ubx ChIP signals, relative to the location of the CRMs (red bars). The bottom two rows compare the patterns of chromatin accessibility (8) between the Nub+ cells of the wing vs haltere (top row) and the Tsh+ vs. Nub+ cells in the haltere (bottom row), for each CRM. Note that Ubx activity as a repressor or activator correlates with less or more accessibility, respectively, in haltere Nub+ cells compared to wing Nub+ cells. Also notable is that the four examples that have Tsh < Nub Ubx binding also have Tsh < Nub chromatin accessibility. In contrast, in the two cases where Ubx binding is observed in both Nub+ and Tsh+ cells, there is no correlation with accessibility differences.
